# Supplementary material for: Improving the performance of protein kinase identification via high dimensional protein–protein interactions and substrate structure data
Source: Royal Society of Chemistry journal article supplement (doi:10.1039/c3mb70462a), 2014-01-06
Supplement: c3mb70462a.pdf [file c3mb70462a.pdf]

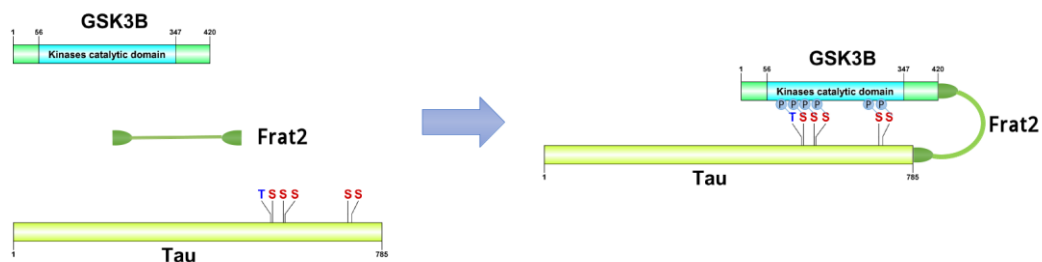

**Figure S1.** Illustration of GSK3B mediated phosphorylation. Frat2 can significantly increase GSK3B mediated phosphorylation of Tau by binding to GSK3B. GSK3B: kinases; Tau: substrate; Frat2: kinase binding protein.

**Table S1.** Numbers of positive and negative data of different kinases in four hierarchical levels

| Kinase name            | Positive number | Negative number |
|------------------------|-----------------|-----------------|
| <b>Kinase level</b>    |                 |                 |
| CDC2                   | 122             | 1649            |
| PKCa                   | 110             | 1608            |
| Ck2alpha               | 91              | 1619            |
| Erk2(MAPK1)            | 82              | 1700            |
| Erk1(MAPK3)            | 77              | 1705            |
| ATM                    | 58              | 1765            |
| CDK2                   | 53              | 1720            |
| GSK3B                  | 44              | 1766            |
| p38a(MAPK14)           | 44              | 1741            |
| PLK1                   | 39              | 1784            |
| CaMK2a                 | 27              | 1777            |
| BARK1                  | 27              | 1772            |
| PDK1                   | 24              | 1799            |
| AurA                   | 22              | 1801            |
| MAPKAPK2               | 20              | 1803            |
| SRC                    | 88              | 377             |
| LCK                    | 43              | 419             |
| SYK                    | 35              | 431             |
| EGFR                   | 34              | 432             |
| ABL1(Abl)              | 32              | 434             |
| FYN                    | 25              | 438             |
| LYN                    | 27              | 435             |
| INSR                   | 27              | 439             |
| <b>Subfamily level</b> |                 |                 |
| CDC2                   | 173             | 1602            |
| ERK1                   | 118             | 1659            |
| Alpha                  | 116             | 1597            |
| ATM                    | 58              | 1758            |

|                     |     |      |
|---------------------|-----|------|
| <b>p38</b>          | 52  | 1730 |
| <b>PLK1</b>         | 39  | 1777 |
| <b>BARK</b>         | 30  | 1765 |
| <b>MAPKAPK</b>      | 21  | 1795 |
| <b>SrcA</b>         | 88  | 378  |
| <b>SrcB</b>         | 64  | 402  |
| <b>Family level</b> |     |      |
| <b>PKC</b>          | 248 | 1575 |
| <b>CDK</b>          | 243 | 1580 |
| <b>MAPK</b>         | 230 | 1593 |
| <b>CK2</b>          | 204 | 1619 |
| <b>PIKK</b>         | 88  | 1735 |
| <b>GRK</b>          | 63  | 1760 |
| <b>GSK</b>          | 58  | 1765 |
| <b>CAMK2</b>        | 46  | 1777 |
| <b>PLK</b>          | 40  | 1783 |
| <b>Aur</b>          | 39  | 1784 |
| <b>PDK1</b>         | 24  | 1799 |
| <b>MAPKAPK</b>      | 22  | 1801 |
| <b>Src</b>          | 173 | 293  |
| <b>Syk</b>          | 46  | 420  |
| <b>EGFR</b>         | 39  | 427  |
| <b>INSR</b>         | 37  | 429  |
| <b>Abl</b>          | 33  | 433  |
| <b>Group level</b>  |     |      |
| <b>CMGC</b>         | 719 | 1104 |
| <b>AGC</b>          | 660 | 1163 |
| <b>CAMK</b>         | 164 | 1659 |
| <b>Other</b>        | 158 | 1665 |
| <b>Atypical</b>     | 95  | 1728 |
| <b>TK</b>           | 452 | 14   |



**Table S3.** Performance comparison with iGPS and NetworKIN at kinase level.

| Kinase        | iGPS          |               | NetworKIN     |               | Proposed        |               |               |               |
|---------------|---------------|---------------|---------------|---------------|-----------------|---------------|---------------|---------------|
|               |               |               |               |               | Medium (Sp>90%) |               | High (Sp>99%) |               |
|               | <i>Sn</i> (%) | <i>Sp</i> (%) | <i>Sn</i> (%) | <i>Sp</i> (%) | <i>Sn</i> (%)   | <i>Sp</i> (%) | <i>Sn</i> (%) | <i>Sp</i> (%) |
| <b>Ck2a1</b>  | 0             | 100           | 93.41         | 92.28         | 94.51           | 94.75         | 79.12         | 99.26         |
| <b>CDC2</b>   | 58.20         | 95.33         | 0.81          | 99.82         | 87.70           | 95.39         | 33.61         | 99.82         |
| <b>PKCA</b>   | 29.09         | 95.83         | 50.00         | 93.97         | 73.64           | 96.21         | 57.27         | 99.07         |
| <b>MAPK1</b>  | 58.54         | 92.06         | 1.22          | 99.59         | 71.95           | 95.94         | 25.61         | 99.71         |
| <b>MAPK3</b>  | 53.25         | 92.73         | 2.60          | 99.65         | 68.83           | 95.01         | 20.78         | 99.71         |
| <b>ATM</b>    | 94.83         | 98.98         | 96.55         | 96.83         | 98.28           | 96.94         | 84.48         | 99.15         |
| <b>CDK2</b>   | 64.15         | 91.74         | 98.11         | 76.63         | 98.11           | 90.64         | 77.36         | 99.07         |
| <b>GSK3B</b>  | 27.27         | 98.75         | 29.55         | 95.53         | 81.82           | 95.98         | 54.55         | 99.26         |
| <b>MAPK14</b> | 61.36         | 90.41         | 25.00         | 93.34         | 84.09           | 98.10         | 65.91         | 99.20         |
| <b>PLK1</b>   | 97.44         | 97.59         | 0             | 99.78         | 76.92           | 98.21         | 17.95         | 99.83         |
| <b>PDK1</b>   | 75.00         | 98.72         | 37.50         | 99.89         | 95.83           | 99.11         | 83.33         | 99.94         |
| <b>BARK1</b>  | 55.56         | 99.21         | -             | -             | 77.78           | 98.65         | 62.96         | 99.27         |
| <b>CAMK2A</b> | 0             | 100           | 22.22         | 99.16         | 62.96           | 95.55         | 40.74         | 99.38         |
| <b>SRC</b>    | 35.23         | 73.21         | 5.68          | 97.35         | 45.45           | 97.35         | 21.45         | 99.20         |
| <b>LCK</b>    | 46.51         | 79.24         | 2.33          | 96.66         | 60.47           | 96.90         | 20.93         | 99.05         |
| <b>SYK</b>    | 94.29         | 85.85         | 5.71          | 100           | 82.86           | 98.84         | 17.14         | 100           |
| <b>EGFR</b>   | 76.47         | 81.71         | 14.71         | 98.15         | 79.41           | 96.99         | 41.18         | 99.31         |
| <b>FYN</b>    | 56.00         | 71.00         | 8.00          | 97.03         | 72.00           | 97.26         | 60.00         | 99.09         |
| <b>ABII</b>   | 56.25         | 89.86         | 9.37          | 96.31         | 68.75           | 98.85         | 59.38         | 99.31         |
| <b>LYN</b>    | 55.56         | 71.26         | 3.70          | 96.78         | 81.48           | 95.17         | 62.96         | 99.31         |
| <b>INSR</b>   | 88.89         | 86.33         | 66.67         | 32.35         | 96.30           | 98.18         | 74.07         | 99.09         |

-: not available

**Table S4.** Performance comparison with IGPS at subfamily, family and group hierarchical levels.

| kinase            | IGPS  |       | Proposed |       |
|-------------------|-------|-------|----------|-------|
|                   | Sn(%) | Sp(%) | Sn(%)    | Sp(%) |
| <b>Subfamily:</b> |       |       |          |       |
| <b>Alpha</b>      | -     | -     | 56.03    | 99.06 |
| <b>ATM</b>        | -     | -     | 86.21    | 99.32 |
| <b>BARK</b>       | -     | -     | 83.33    | 99.43 |
| <b>CDC2</b>       | -     | -     | 63.01    | 99.06 |
| <b>ERK1</b>       | -     | -     | 53.39    | 99.04 |
| <b>MAPKAPK</b>    | -     | -     | 47.62    | 99.28 |
| <b>P38</b>        | -     | -     | 48.08    | 99.13 |
| <b>PLK1</b>       | -     | -     | 64.10    | 99.04 |
| <b>SrcA</b>       | -     | -     | 18.18    | 99.21 |
| <b>SrcB</b>       | -     | -     | 32.81    | 99.00 |
| <b>Family:</b>    |       |       |          |       |
| <b>GRK</b>        | 63.49 | 99.66 | 76.19    | 99.72 |
| <b>PDK1</b>       | 100.0 | 0.00  | 95.83    | 99.61 |
| <b>PIKK</b>       | 96.59 | 94.76 | 97.73    | 96.71 |
| <b>CAMK2</b>      | 30.43 | 95.78 | 47.83    | 99.04 |
| <b>PKC</b>        | 30.24 | 95.56 | 48.79    | 99.05 |
| <b>MAPKAPK</b>    | 68.18 | 97.67 | 72.73    | 97.72 |
| <b>CDK</b>        | 62.14 | 93.42 | 63.79    | 98.92 |
| <b>CK2</b>        | 57.35 | 98.09 | 77.94    | 99.01 |
| <b>GSK</b>        | 60.35 | 94.16 | 67.24    | 97.22 |
| <b>MAPK</b>       | 58.26 | 91.78 | 60.43    | 98.18 |
| <b>Aur</b>        | 100.0 | 0.00  | 76.92    | 99.33 |
| <b>PLK*</b>       | 97.50 | 97.36 | 75.00    | 98.82 |
| <b>Abl</b>        | 57.58 | 90.07 | 66.67    | 99.08 |
| <b>EGFR</b>       | 76.92 | 74.01 | 87.18    | 97.42 |
| <b>InsR</b>       | 86.49 | 87.88 | 89.19    | 98.37 |
| <b>Src</b>        | 48.56 | 80.55 | 50.29    | 93.17 |
| <b>Syk</b>        | 91.30 | 87.62 | 80.43    | 95.71 |
| <b>Group:</b>     |       |       |          |       |
| <b>AGC</b>        | 57.42 | 91.83 | 59.24    | 96.73 |
| <b>Atypical</b>   | 92.63 | 94.04 | 93.68    | 96.64 |
| <b>Other*</b>     | 87.34 | 83.96 | 74.05    | 90.03 |
| <b>CMGC</b>       | 49.10 | 95.02 | 58.28    | 99.00 |
| <b>TK</b>         | -     | -     | 64.82    | 92.86 |
| <b>CAMK</b>       | -     | -     | 33.54    | 99.04 |

-: not available

**Table S5.** Enrichment analysis of proteins associated with selected PPIs for kinase GSK3B.

| Category        | Term                                                              | PValue   | Benjamini | FDR      |
|-----------------|-------------------------------------------------------------------|----------|-----------|----------|
| GOTERM_BP_FAT   | GO:0005977~glycogen metabolic process                             | 1.17E-05 | 0.008024  | 0.01755  |
| GOTERM_BP_FAT   | GO:0006073~cellular glucan metabolic process                      | 1.31E-05 | 0.004508  | 0.019685 |
| GOTERM_BP_FAT   | GO:0044042~glucan metabolic process                               | 1.31E-05 | 0.004508  | 0.019685 |
| GOTERM_BP_FAT   | GO:0006112~energy reserve metabolic process                       | 2.68E-05 | 0.00616   | 0.040375 |
| INTERPRO        | IPR003659:Plexin/semaphorin/integrin                              | 2.96E-05 | 0.002825  | 0.036848 |
| GOTERM_BP_FAT   | GO:0044264~cellular polysaccharide metabolic process              | 6.18E-05 | 0.010613  | 0.092936 |
| GOTERM_BP_FAT   | GO:0005976~polysaccharide metabolic process                       | 8.52E-05 | 0.011712  | 0.128256 |
| SP_PIR_KEYWORDS | glycogen biosynthesis                                             | 2.95E-04 | 0.023878  | 0.35675  |
| PIR_SUPERFAMILY | PIRSF001238:cyclic amidohydrolases (dihydroorotase, allantoinase) | 3.81E-04 | 0.015862  | 0.351714 |
| GOTERM_BP_FAT   | GO:0006006~glucose metabolic process                              | 3.82E-04 | 0.043084  | 0.574033 |
| GOTERM_BP_FAT   | GO:0009250~glucan biosynthetic process                            | 8.72E-04 | 0.064779  | 1.304604 |
| GOTERM_BP_FAT   | GO:0005978~glycogen biosynthetic process                          | 8.72E-04 | 0.064779  | 1.304604 |
| GOTERM_BP_FAT   | GO:0019318~hexose metabolic process                               | 0.00107  | 0.065037  | 1.598703 |
| GOTERM_BP_FAT   | GO:0042254~ribosome biogenesis                                    | 0.001506 | 0.083112  | 2.242956 |
| GOTERM_BP_FAT   | GO:0005996~monosaccharide metabolic process                       | 0.002031 | 0.102448  | 3.014839 |
| GOTERM_BP_FAT   | GO:0015980~energy derivation by oxidation of organic compounds    | 0.002757 | 0.119436  | 4.071431 |
| KEGG_PATHWAY    | hsa04360:Axon guidance                                            | 0.002833 | 0.151706  | 2.782874 |
| GOTERM_BP_FAT   | GO:0033692~cellular polysaccharide biosynthetic process           | 0.004955 | 0.19307   | 7.205018 |
| GOTERM_BP_FAT   | GO:0022613~ribonucleoprotein complex biogenesis                   | 0.006097 | 0.220088  | 8.795399 |
| GOTERM_MF_FAT   | GO:0008466~glycogenin glucosyltransferase activity                | 0.007688 | 0.809723  | 9.323882 |
| GOTERM_BP_FAT   | GO:0019853~L-ascorbic acid biosynthetic process                   | 0.008115 | 0.256462  | 11.54413 |
| GOTERM_BP_FAT   | GO:0006091~generation of precursor metabolites and energy         | 0.008683 | 0.260157  | 12.30395 |
| GOTERM_BP_FAT   | GO:0016051~carbohydrate biosynthetic process                      | 0.009368 | 0.266347  | 13.21199 |
| PIR_SUPERFAMILY | PIRSF000465:glycogenin (glycosyl transferase)                     | 0.01025  | 0.194557  | 9.094911 |
| GOTERM_BP_FAT   | GO:0000271~polysaccharide biosynthetic process                    | 0.014368 | 0.36527   | 19.57701 |
| UP_SEQ_FEATURE  | glycosylation site:O-linked (Glc...)                              | 0.018954 | 0.615871  | 22.56322 |
| GOTERM_MF_FAT   | GO:0035251~UDP-glucosyltransferase activity                       | 0.030406 | 0.963822  | 32.40224 |
| UP_SEQ_FEATURE  | nucleotide phosphate-binding region:NADP                          | 0.030968 | 0.740287  | 34.31944 |
| INTERPRO        | IPR002495:Glycosyl transferase, family 8                          | 0.031265 | 0.490389  | 32.64065 |
| GOTERM_CC_FAT   | GO:0005730~nucleolus                                              | 0.03186  | 0.978786  | 31.00416 |
| GOTERM_BP_FAT   | GO:0034637~cellular carbohydrate biosynthetic process             | 0.032006 | 0.608037  | 38.7202  |
| GOTERM_MF_FAT   | GO:0046527~glucosyltransferase activity                           | 0.034142 | 0.917055  | 35.63253 |
| SP_PIR_KEYWORDS | glycoprotein                                                      | 0.04676  | 0.674358  | 44.04851 |
